# Supplementary material for: Factors that influence clinicians’ decisions to decrease active surveillance monitoring frequency or transition to watchful waiting for localised prostate cancer: a qualitative study
Source: HighWire-hosted journal article supplement (doi:10.1136/bmjopen-2020-048347), 2021-11-01
Supplement: bmjopen-2020-048347supp001_data_supplement.pdf [file bmjopen-2020-048347supp001_data_supplement.pdf]

## Consolidated criteria for reporting qualitative studies (COREQ): 32-item checklist

| No                                             | Item                                     | Guide questions/description                                                                                                                                     | Page |
|------------------------------------------------|------------------------------------------|-----------------------------------------------------------------------------------------------------------------------------------------------------------------|------|
| <b>Domain 1: Research team and reflexivity</b> |                                          |                                                                                                                                                                 |      |
| Personal Characteristics                       |                                          |                                                                                                                                                                 |      |
| 1.                                             | Interviewer/facilitator                  | Which author/s conducted the interview or focus group?                                                                                                          | 16   |
| 2.                                             | Credentials                              | What were the researcher's credentials? <i>E.g. PhD, MD</i>                                                                                                     | 1    |
| 3.                                             | Occupation                               | What was their occupation at the time of the study?                                                                                                             | 1    |
| 4.                                             | Gender                                   | Was the researcher male or female?                                                                                                                              | 16   |
| 5.                                             | Experience and training                  | What experience or training did the researcher have?                                                                                                            | 1    |
| Relationship with participants                 |                                          |                                                                                                                                                                 |      |
| 6.                                             | Relationship established                 | Was a relationship established prior to study commencement?                                                                                                     | 16   |
| 7.                                             | Participant knowledge of the interviewer | What did the participants know about the researcher? <i>e.g. personal goals, reasons for doing the research</i>                                                 | 16   |
| 8.                                             | Interviewer characteristics              | What characteristics were reported about the interviewer/facilitator? <i>e.g. Bias, assumptions, reasons and interests in the research topic</i>                | 16   |
| <b>Domain 2: study design</b>                  |                                          |                                                                                                                                                                 |      |
| Theoretical framework                          |                                          |                                                                                                                                                                 |      |
| 9.                                             | Methodological orientation and Theory    | What methodological orientation was stated to underpin the study? <i>e.g. grounded theory, discourse analysis, ethnography, phenomenology, content analysis</i> | 7    |

| No                    | Item                         | Guide questions/description                                                               | Page |
|-----------------------|------------------------------|-------------------------------------------------------------------------------------------|------|
| Participant selection |                              |                                                                                           |      |
| 10.                   | Sampling                     | How were participants selected? <i>e.g. purposive, convenience, consecutive, snowball</i> | 8    |
| 11.                   | Method of approach           | How were participants approached? <i>e.g. face-to-face, telephone, mail, email</i>        | 8    |
| 12.                   | Sample size                  | How many participants were in the study?                                                  | 8    |
| 13.                   | Non-participation            | How many people refused to participate or dropped out? Reasons?                           | 9    |
| Setting               |                              |                                                                                           |      |
| 14.                   | Setting of data collection   | Where was the data collected? <i>e.g. home, clinic, workplace</i>                         | 8    |
| 15.                   | Presence of non-participants | Was anyone else present besides the participants and researchers?                         | 8    |
| 16.                   | Description of sample        | What are the important characteristics of the sample? <i>e.g. demographic data, date</i>  | 7    |
| Data collection       |                              |                                                                                           |      |
| 17.                   | Interview guide              | Were questions, prompts, guides provided by the authors? Was it pilot tested?             | 8    |
| 18.                   | Repeat interviews            | Were repeat interviews carried out? If yes, how many?                                     | 8    |
| 19.                   | Audio/visual recording       | Did the research use audio or visual recording to collect the data?                       | 8    |
| 20.                   | Field notes                  | Were field notes made during and/or after the interview or focus group?                   | NR   |
| 21.                   | Duration                     | What was the duration of the interviews or focus group?                                   | 8    |
| 22.                   | Data saturation              | Was data saturation discussed?                                                            | 8    |

| No                                     | Item                           | Guide questions/description                                                                                                              | Page |
|----------------------------------------|--------------------------------|------------------------------------------------------------------------------------------------------------------------------------------|------|
| 23.                                    | Transcripts returned           | Were transcripts returned to participants for comment and/or correction?                                                                 | NR   |
| <b>Domain 3: analysis and findings</b> |                                |                                                                                                                                          |      |
| Data analysis                          |                                |                                                                                                                                          |      |
| 24.                                    | Number of data coders          | How many data coders coded the data?                                                                                                     | 9    |
| 25.                                    | Description of the coding tree | Did authors provide a description of the coding tree?                                                                                    | NR   |
| 26.                                    | Derivation of themes           | Were themes identified in advance or derived from the data?                                                                              | 9    |
| 27.                                    | Software                       | What software, if applicable, was used to manage the data?                                                                               | 8    |
| 28.                                    | Participant checking           | Did participants provide feedback on the findings?                                                                                       | NR   |
| Reporting                              |                                |                                                                                                                                          |      |
| 29.                                    | Quotations presented           | Were participant quotations presented to illustrate the themes / findings? Was each quotation identified? <i>e.g. participant number</i> | 10   |
| 30.                                    | Data and findings consistent   | Was there consistency between the data presented and the findings?                                                                       | 10   |
| 31.                                    | Clarity of major themes        | Were major themes clearly presented in the findings?                                                                                     | 9    |
| 32.                                    | Clarity of minor themes        | Is there a description of diverse cases or discussion of minor themes?                                                                   | 10   |
